# Supplementary material
Source: PubMed Central journal article supplement (PMC6685192)
Supplement: Supp_Fig1.pdf [file Supp_Fig1.pdf]

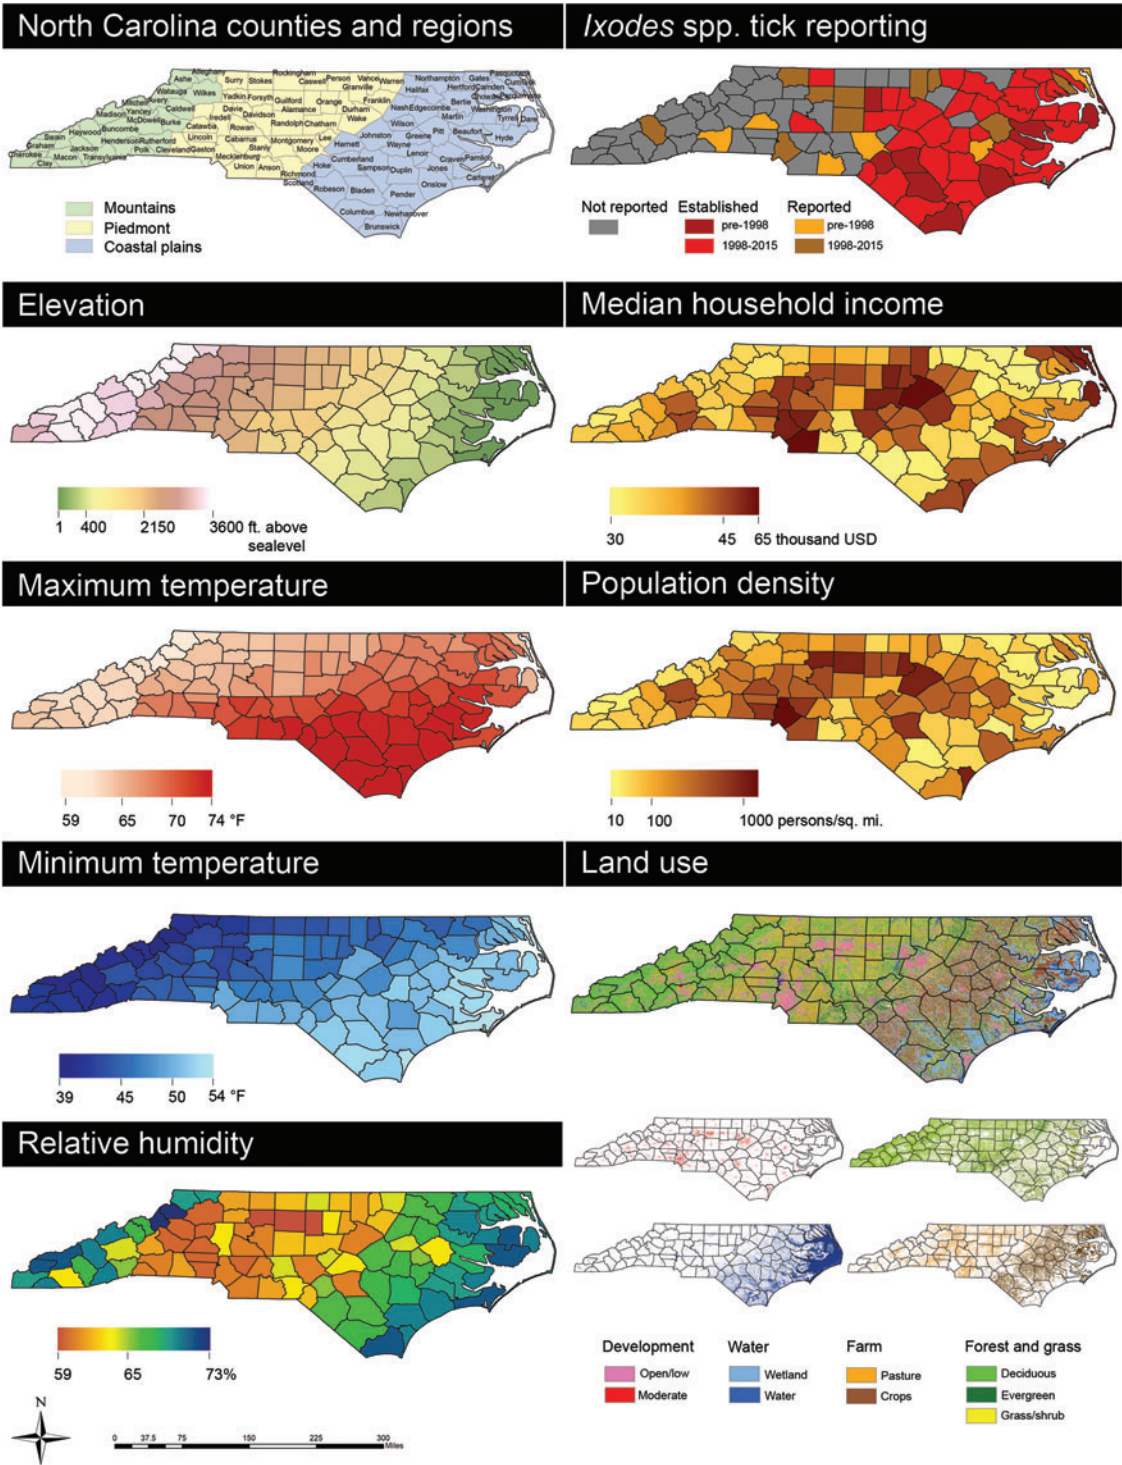

**SUPPLEMENTARY FIG. S1.** Maps of explanatory variables. Each factor is shown across North Carolina. For factors that differed annually (temperature, relative humidity, median household income, and population density), maps represent the average over the entire study period. For land use, only the 2011 data are shown for simplicity.
