# Supplementary material
Source: PubMed Central journal article supplement (PMC6685192)
Supplement: Supp_Table1.pdf [file Supp_Table1.pdf]

SUPPLEMENTARY TABLE S1. DEMOGRAPHIC CHARACTERISTICS OF STUDY POPULATION

|                     | <i>Total samples</i> | <i>Percentage of samples</i> |
|---------------------|----------------------|------------------------------|
| <b>Breed</b>        |                      |                              |
| Labrador retriever  | 508                  | 11.4                         |
| Mixed breed         | 405                  | 9.1                          |
| Golden retriever    | 251                  | 5.6                          |
| German shepherd dog | 239                  | 5.4                          |
| <b>Gender</b>       |                      |                              |
| Female intact       | 311                  | 8.0                          |
| Female spayed       | 1672                 | 42.9                         |
| Male intact         | 506                  | 13.0                         |
| Male neutered       | 1405                 | 36.1                         |

Most frequent breeds shown; each remaining breed (214 breeds) made up <5% of the study population. Breed was not reported for 32 dogs (0.7%), gender was not reported for 552 dogs (12.4%).
